# Supplementary material for: A systematic examination of the impacts of MOF flexibility on intracrystalline molecular diffusivities
Source: Royal Society of Chemistry journal article supplement (doi:10.1039/d1ta09267g), 2022-01-01
Supplement: d1ta09267g1.pdf [file d1ta09267g1.pdf]

## **SUPPORTING INFORMATION for**

### **A systematic examination of the impacts of MOF flexibility on intracrystalline molecular diffusivities**

Yuhan Yang and David S. Sholl\*

*School of Chemical & Biomolecular Engineering*

*Georgia Institute of Technology, Atlanta, GA 30332-100, USA*

#### **Tables S1-S9**

Cell and pore parameters of the experimentally reported, DFT optimized, FF energy minimized and NPT relaxed structures of 17 MOFs; self-diffusion coefficients of the adsorbates in flexible and rigid frameworks; average window diameter of the flexible empty and loaded windows; standard deviation of the flexible empty and loaded window size distribution; comparison of Self-diffusion coefficients of the alkanes in flexible and rigid MOF-5; fitted adsorbate equivalent diameter and uncertainty; fitted slopes  $k$  and R-squared values in Figure 11.

#### **Figures S1-S8**

Illustration of MAPCIP; comparison of unit cell volume, LCD and PLD between energy minimized and NPT relaxed structures using UFF4MOF; comparison of LCD and (b) PLD between FF optimized and DFT optimized structures; comparison of LCD and PLD between experimental structures and DFT optimized, FF energy minimized and NPT relaxed structures; an example MSD profile of discrete hops in rigid frameworks; differences between the rigid and average flexible window diameters plotted as a function of average empty window size for 17 MOFs; ratio of self-diffusivities in flexible frameworks to diffusivities in rigid frameworks plotted as a function of corrected window size; comparison of self-diffusivities between simulations with rigid and flexible small pore MOFs.

### **Inputs examples of each type of simulation (ZIP)**

|   |                                                    |
|---|----------------------------------------------------|
| 0 | README.txt                                         |
| 1 | Example input files for DFT optimization           |
| 2 | Example input files for force field optimization   |
| 3 | Example input files for conventional MD simulation |
| 4 | Example input files for dcTST simulation           |
| 5 | LAMMPS data files of the 17 MOFs and MOF-5         |

**Table S1.** Lattice parameters of the experimentally-reported, DFT optimized, FF energy minimized and NPT relaxed structures of 17 MOFs, with all distances in Å.

|          | Experimental |        |        |                          | DFT                |                    |                    |                    |
|----------|--------------|--------|--------|--------------------------|--------------------|--------------------|--------------------|--------------------|
|          | a<br>Å       | b<br>Å | c<br>Å | Volume<br>Å <sup>3</sup> | a/a <sub>exp</sub> | b/b <sub>exp</sub> | c/c <sub>exp</sub> | V/V <sub>exp</sub> |
| LOGBAK   | 18.740       | 18.740 | 9.439  | 3314.860                 | 1.002              | 1.002              | 1.006              | 1.010              |
| EZOFOF   | 26.816       | 26.816 | 26.816 | 19283.330                | 1.005              | 1.005              | 1.005              | 1.015              |
| HIFVUO01 | 14.576       | 14.576 | 14.576 | 2383.700                 | 1.001              | 1.001              | 1.001              | 1.004              |
| HOLQIK   | 25.384       | 25.384 | 25.384 | 16356.120                | 1.011              | 1.011              | 1.011              | 1.034              |
| KUCDIW   | 26.815       | 26.815 | 26.815 | 19281.600                | 0.996              | 0.996              | 0.996              | 0.988              |
| MAPCIP   | 15.261       | 15.261 | 28.898 | 6730.290                 | 0.976              | 0.976              | 0.975              | 0.929              |
| BUKRUW01 | 20.162       | 20.162 | 20.162 | 8195.860                 | 1.006              | 1.006              | 1.006              | 1.018              |
| ABAYIO   | 26.771       | 26.771 | 26.771 | 19186.410                | 0.990              | 0.990              | 0.990              | 0.970              |
| LUXFOA   | 26.291       | 26.291 | 26.291 | 18172.780                | 0.992              | 0.992              | 0.992              | 0.975              |
| HUJGEA   | 17.926       | 17.926 | 28.063 | 9017.410                 | 1.003              | 1.003              | 1.013              | 1.019              |
| VIXPUP01 | 18.663       | 27.916 | 32.364 | 15560.450                | 1.000              | 1.019              | 0.999              | 1.023              |
| GEGDED   | 12.247       | 25.914 | 25.914 | 8224.530                 | 1.012              | 1.010              | 1.012              | 1.035              |
| WULJUJ   | 26.326       | 26.326 | 26.326 | 18244.620                | 1.007              | 1.007              | 1.007              | 1.022              |
| LAQNID   | 18.692       | 18.692 | 35.920 | 12550.520                | 1.008              | 1.008              | 1.004              | 1.021              |
| KOZQEX   | 27.860       | 27.860 | 27.860 | 21624.370                | 1.006              | 1.006              | 1.006              | 1.017              |
| XICZAM   | 27.584       | 27.584 | 27.584 | 14841.100                | 0.998              | 0.998              | 0.998              | 0.995              |
| IYOWID   | 27.736       | 27.736 | 27.736 | 21337.830                | 1.005              | 1.005              | 1.004              | 1.014              |

|          | Supercell* | FF Energy Minimized |                    |                    |                    | FF NPT             |                    |                    |                    |
|----------|------------|---------------------|--------------------|--------------------|--------------------|--------------------|--------------------|--------------------|--------------------|
|          |            | a/a <sub>exp</sub>  | b/b <sub>exp</sub> | c/c <sub>exp</sub> | V/V <sub>exp</sub> | a/a <sub>exp</sub> | b/b <sub>exp</sub> | c/c <sub>exp</sub> | V/V <sub>exp</sub> |
| LOGBAK   | 2×2×3      | 1.001               | 1.001              | 0.993              | 0.994              | 0.995              | 0.991              | 0.987              | 0.973              |
| EZOFOF   | 2×1×1      | 0.997               | 0.997              | 0.997              | 0.992              | 0.959              | 0.995              | 0.958              | 0.914              |
| HIFVUO01 | 3×3×3      | 0.980               | 0.964              | 0.977              | 0.927              | 0.979              | 0.971              | 0.978              | 0.926              |
| HOLQIK   | 2×1×1      | 0.994               | 0.994              | 0.994              | 0.981              | 0.990              | 0.992              | 0.987              | 0.970              |
| KUCDIW   | 2×1×1      | 0.972               | 0.972              | 0.972              | 0.918              | 0.973              | 0.972              | 0.967              | 0.914              |
| MAPCIP   | 2×2×1      | 0.970               | 0.970              | 1.128              | 1.061              | 0.972              | 0.972              | 1.125              | 1.063              |
| BUKRUW01 | 2×2×2      | 0.990               | 0.990              | 0.990              | 0.969              | 0.998              | 0.994              | 0.995              | 0.987              |
| ABAYIO   | 2×1×1      | 1.024               | 1.024              | 1.024              | 1.072              | 1.024              | 1.020              | 1.024              | 1.069              |
| LUXFOA   | 2×1×1      | 0.978               | 0.982              | 0.980              | 0.941              | 1.020              | 1.015              | 1.018              | 1.054              |
| HUJGEA   | 2×2×1      | 1.025               | 1.025              | 1.007              | 1.057              | 1.026              | 1.027              | 0.997              | 1.051              |
| VIXPUP01 | 2×1×1      | 1.029               | 1.017              | 1.027              | 1.064              | 1.030              | 1.005              | 1.028              | 1.056              |
| GEGDED   | 3×1×1      | 1.007               | 1.044              | 1.043              | 1.096              | 0.978              | 1.032              | 1.036              | 1.046              |
| WULJUJ   | 2×1×1      | 1.028               | 1.028              | 1.028              | 1.085              | 1.028              | 1.028              | 1.021              | 1.079              |
| LAQNID   | 2×2×1      | 1.027               | 1.027              | 1.008              | 1.064              | 1.025              | 1.022              | 1.006              | 1.054              |
| KOZQEX   | 1×1×1      | 1.007               | 1.010              | 1.014              | 1.032              | 1.018              | 1.005              | 1.003              | 1.026              |
| XICZAM   | 1×1×2      | 0.988               | 0.988              | 0.988              | 0.965              | 0.990              | 0.989              | 0.862              | 0.974              |
| IYOWID   | 1×1×1      | 0.978               | 0.973              | 0.974              | 0.927              | 0.972              | 0.967              | 0.966              | 0.908              |

\* The supercells listed were used for force field energy minimization and relaxation to ensure the simulation box sides are larger than doubled LJ potential cutoff (12.5 Å). A single unit cell was used to compare the lattice parameters between different methods.

**Table S2.** Pore parameters of the experimentally-reported, DFT optimized, FF energy minimized and NPT relaxed structures, with all distances in Å.

|          | Original |       | DFT    |       | FF Energy Minimized |       | FF NPT |       |
|----------|----------|-------|--------|-------|---------------------|-------|--------|-------|
|          | LCD      | PLD   | LCD    | PLD   | LCD                 | PLD   | LCD    | PLD   |
|          | Å        | Å     | Å      | Å     | Å                   | Å     | Å      | Å     |
| LOGBAK   | 8.339    | 3.643 | 8.481  | 3.702 | 7.126               | 2.975 | 7.150  | 3.076 |
| EZOFOF   | 16.097   | 3.034 | 16.121 | 3.183 | 14.687              | 3.590 | 14.007 | 2.938 |
| HIFVUO01 | 11.713   | 3.299 | 11.708 | 3.172 | 11.399              | 3.175 | 11.237 | 3.198 |
| HOLQIK   | 12.108   | 3.446 | 12.109 | 3.389 | 10.191              | 3.280 | 11.109 | 3.247 |
| KUCDIW   | 15.330   | 4.287 | 14.834 | 4.165 | 14.418              | 3.867 | 14.231 | 3.813 |
| MAPCIP   | 9.537    | 5.448 | 9.251  | 5.103 | 8.542               | 4.615 | 8.660  | 4.501 |
| BUKRUW01 | 10.640   | 5.176 | 10.951 | 4.993 | 9.821               | 4.951 | 9.649  | 5.018 |
| ABAYIO   | 11.408   | 4.323 | 11.266 | 4.324 | 11.068              | 4.699 | 11.300 | 5.006 |
| LUXFOA   | 13.739   | 4.318 | 13.878 | 4.227 | 11.808              | 4.310 | 13.752 | 5.045 |
| HUJGEA   | 12.539   | 4.791 | 12.468 | 4.623 | 13.258              | 4.915 | 13.332 | 5.143 |
| VIXPUP01 | 10.939   | 6.908 | 11.376 | 6.556 | 11.918              | 6.604 | 11.918 | 6.604 |
| GEGDED   | 10.731   | 6.574 | 10.877 | 6.625 | 11.837              | 6.435 | 11.842 | 6.402 |
| WULJUJ   | 13.252   | 6.696 | 13.500 | 6.761 | 13.875              | 6.870 | 13.895 | 6.833 |
| LAQNID   | 13.514   | 6.533 | 13.468 | 6.609 | 13.803              | 6.878 | 13.723 | 6.808 |
| KOZQEX   | 22.424   | 6.861 | 22.744 | 6.738 | 21.868              | 6.736 | 22.298 | 6.905 |
| XICZAM   | 19.521   | 6.646 | 19.224 | 6.852 | 19.510              | 7.649 | 19.709 | 7.563 |
| IYOWID   | 20.517   | 7.748 | 20.207 | 7.949 | 15.332              | 7.752 | 15.040 | 7.725 |

**Table S3** Self-diffusion coefficients [ $\text{cm}^2/\text{s}$ ] of the adsorbates in flexible frameworks.

|          | He       | CH <sub>4</sub> | SF <sub>6</sub> | CCl <sub>4</sub> | O <sub>2</sub> | N <sub>2</sub> | CO <sub>2</sub> | C <sub>6</sub> H <sub>6</sub> | H <sub>2</sub> O | n-C <sub>4</sub> | i-C <sub>4</sub> | n-C <sub>6</sub> |
|----------|----------|-----------------|-----------------|------------------|----------------|----------------|-----------------|-------------------------------|------------------|------------------|------------------|------------------|
| LOGBAK   | 1.04E-04 | 1.76E-06        | 1.32E-32        | 1.26E-85         | 1.00E-06       | 3.53E-07       | 7.42E-07        | *                             | 7.48E-08         | 1.00E-37         | *                | 1.00E-25         |
| EZOFOP   | 2.09E-04 | 1.27E-06        | 8.72E-16        | 4.59E-25         | 2.84E-05       | 1.04E-05       | 1.08E-05        | 2.50E-08                      | 1.93E-05         | 9.16E-07         | 1.64E-10         | 1.06E-09         |
| HIFVUO   | 9.74E-05 | 6.10E-07        | 8.88E-17        | 1.77E-32         | 5.46E-05       | 2.96E-05       | 4.41E-06        | 7.73E-07                      | 9.94E-06         | 1.11E-08         | 5.15E-13         | 1.51E-08         |
| HOLQIK   | 9.38E-05 | 3.17E-06        | 3.15E-10        | 1.31E-11         | 6.36E-05       | 1.53E-05       | 4.52E-05        | 5.60E-07                      | 2.35E-06         | 2.33E-07         | 1.62E-07         | 1.69E-07         |
| KUCDIW   | 3.70E-04 | 2.02E-05        | 1.93E-11        | 3.15E-29         | 1.08E-04       | 7.42E-05       | 1.14E-05        | 5.12E-05                      | 1.32E-06         | 2.50E-07         | 6.30E-31         | 2.84E-07         |
| MAPCIP   | 7.32E-04 | 1.43E-04        | 1.18E-05        | 1.40E-07         | 2.97E-04       | 2.92E-04       | 1.26E-04        | 9.82E-06                      | 3.27E-06         | 4.33E-05         | 2.50E-05         | 1.36E-05         |
| BUKRUW01 | 8.07E-04 | 1.83E-04        | 3.42E-06        | 1.66E-08         | 2.62E-04       | 2.76E-04       | 1.29E-04        | 1.59E-05                      | 8.63E-06         | 3.38E-05         | 7.40E-06         | 2.15E-05         |
| ABAYIO   | 5.72E-04 | 6.46E-06        | 1.64E-08        | 1.66E-13         | 2.77E-05       | 2.14E-05       | 1.30E-05        | 2.50E-08                      | 9.90E-06         | 9.16E-07         | 1.26E-08         | 6.53E-08         |
| LUXFOA   | 6.56E-04 | 1.20E-04        | 8.67E-07        | 1.11E-08         | 1.10E-04       | 1.22E-04       | 7.30E-05        | 5.75E-07                      | 3.50E-06         | 6.92E-06         | 2.26E-06         | 7.86E-06         |
| HUJGEA   | 8.15E-04 | 1.14E-04        | 1.16E-06        | 1.38E-07         | 1.37E-04       | 1.42E-04       | 4.22E-05        | 1.42E-07                      | 4.48E-07         | 4.88E-07         | 1.35E-06         | 4.95E-07         |
| VIXPUP01 | 1.21E-03 | 2.10E-04        | 1.16E-05        | 1.10E-05         | 2.98E-04       | 3.27E-04       | 4.48E-05        | 2.49E-07                      | 3.12E-06         | 8.53E-06         | 3.33E-06         | 5.43E-06         |
| GEGDED   | 1.13E-03 | 7.95E-05        | 3.21E-05        | 1.46E-05         | 2.18E-04       | 2.30E-04       | 2.01E-05        | 7.28E-05                      | 4.31E-06         | 5.56E-06         | 4.54E-05         | 5.66E-06         |
| WULJUI   | 9.13E-04 | 4.88E-05        | 7.96E-06        | 1.38E-06         | 1.70E-04       | 2.50E-04       | 5.22E-05        | 5.15E-05                      | 7.98E-06         | 4.72E-06         | 1.15E-05         | 5.68E-07         |
| LAQNID   | 1.58E-03 | 1.33E-04        | 9.51E-06        | 1.42E-06         | 2.31E-04       | 3.03E-04       | 5.95E-05        | 2.57E-05                      | 5.03E-06         | 3.04E-07         | 2.28E-06         | 3.54E-07         |
| KOZQEX   | 2.13E-03 | 4.31E-04        | 2.11E-05        | 1.12E-06         | 2.95E-03       | 2.29E-03       | 6.09E-04        | 1.76E-06                      | 5.95E-06         | 1.49E-05         | 1.59E-05         | 3.67E-06         |
| XICZAM   | 1.32E-03 | 1.80E-04        | 8.94E-06        | 1.78E-06         | 1.10E-04       | 1.22E-04       | 7.30E-05        | 5.75E-07                      | 3.50E-06         | 6.92E-06         | 2.26E-06         | 7.86E-06         |
| IYOWID   | 1.05E-03 | 1.42E-04        | 7.59E-06        | 1.92E-06         | 8.56E-05       | 3.06E-05       | 2.09E-05        | 6.66E-06                      | 4.07E-06         | 7.85E-06         | 1.02E-05         | 3.32E-06         |

\* No data available. The adsorbate is too large to fit in the pore, so we could not get reliable quality of sampling in either regular MD or umbrella sampling simulation.

Self-diffusion coefficients highlighted grey were calculated with dcTST.

**Table S4** Self-diffusion coefficients [ $\text{cm}^2/\text{s}$ ] of the adsorbates in rigid framework.

|          | He       | CH <sub>4</sub> | SF <sub>6</sub> | CCl <sub>4</sub> | O <sub>2</sub> | N <sub>2</sub> | CO <sub>2</sub> | C <sub>6</sub> H <sub>6</sub> | H <sub>2</sub> O | n-C <sub>4</sub> | i-C <sub>4</sub> | n-C <sub>6</sub> |
|----------|----------|-----------------|-----------------|------------------|----------------|----------------|-----------------|-------------------------------|------------------|------------------|------------------|------------------|
| LOGBAK   | 4.50E-04 | 8.00E-08        | *               | *                | 9.78E-07       | 2.25E-08       | 2.83E-07        | *                             | 5.50E-04         | *                | *                | *                |
| EZOFOF   | 1.17E-03 | 6.42E-05        | *               | *                | 7.32E-06       | 2.10E-06       | 3.39E-06        | 1.78E-08                      | 5.62E-04         | 1.57E-04         | 1.64E-07         | 2.77E-05         |
| HIFVUO   | 5.47E-04 | 1.73E-05        | *               | *                | 1.95E-06       | 4.81E-08       | 6.93E-09        | 2.00E-09                      | 2.89E-05         | 6.00E-09         | *                | 7.00E-09         |
| HOLQIK   | 3.29E-04 | 1.48E-06        | *               | *                | 8.20E-07       | 6.07E-08       | 6.34E-07        | 3.00E-08                      | 1.40E-04         | 3.84E-07         | 2.00E-08         | 2.00E-08         |
| KUCDIW   | 2.55E-03 | 2.48E-04        | *               | *                | 4.21E-05       | 2.78E-05       | 6.14E-06        | 3.00E-08                      | 1.00E-03         | 2.19E-04         | *                | 3.04E-05         |
| MAPCIP   | 4.36E-03 | 6.87E-04        | 1.04E-05        | 1.31E-06         | 3.20E-04       | 2.72E-04       | 1.40E-04        | 1.09E-05                      | 1.37E-03         | 6.28E-04         | 5.13E-04         | 4.76E-04         |
| BUKRUW01 | 1.76E-01 | 4.53E-02        | 3.42E-06        | 8.00E-11         | 1.94E-04       | 2.42E-04       | 9.13E-05        | 1.16E-05                      | 3.88E-03         | 2.46E-03         | 6.74E-04         | 6.12E-04         |
| ABAYIO   | 2.74E-03 | 2.96E-04        | *               | *                | 2.56E-05       | 2.72E-05       | 1.30E-05        | 4.49E-08                      | 1.01E-03         | 4.85E-04         | 1.81E-04         | 5.73E-04         |
| LUXFOA   | 9.43E-03 | 7.20E-04        | 1.55E-06        | 3.03E-07         | 1.76E-04       | 2.09E-04       | 7.14E-05        | 8.43E-07                      | 8.21E-04         | 1.35E-03         | 4.18E-04         | 4.34E-03         |
| HUJGEA   | 3.30E-03 | 7.74E-04        | 1.58E-07        | 2.00E-09         | 1.49E-04       | 1.69E-04       | 3.85E-05        | 1.31E-07                      | 1.39E-03         | 2.66E-04         | 4.65E-05         | 1.18E-04         |
| VIXPUP01 | 6.78E-03 | 1.33E-03        | 1.76E-05        | 3.77E-06         | 3.44E-04       | 2.68E-04       | 9.74E-05        | 1.92E-07                      | 2.43E-03         | 7.53E-04         | 5.06E-04         | 7.09E-04         |
| GEGDED   | 8.79E-03 | 1.55E-03        | 3.84E-06        | 1.53E-06         | 2.63E-04       | 2.34E-04       | 6.02E-05        | 2.49E-05                      | 3.88E-03         | 9.62E-04         | 6.73E-04         | 3.64E-04         |
| WULJUJ   | 6.69E-03 | 8.10E-04        | 1.97E-05        | 8.29E-06         | 1.85E-04       | 1.55E-04       | 4.03E-05        | 4.00E-11                      | 1.73E-03         | 7.04E-04         | 3.60E-04         | 5.50E-04         |
| LAQNID   | 6.62E-03 | 1.16E-03        | 2.15E-06        | 1.31E-06         | 2.39E-04       | 2.58E-04       | 6.05E-05        | 1.00E-08                      | 1.96E-03         | 1.04E-03         | 7.74E-04         | 7.03E-04         |
| KOZQEX   | 1.06E-02 | 3.01E-03        | 6.64E-05        | 7.44E-06         | 5.40E-04       | 6.10E-04       | 1.96E-04        | 1.79E-06                      | 5.12E-03         | 1.27E-03         | 1.10E-03         | 1.13E-03         |
| XICZAM   | 1.40E-02 | 1.83E-03        | 1.17E-05        | 2.77E-06         | 2.95E-04       | 4.07E-04       | 8.02E-05        | 4.30E-07                      | 2.36E-03         | 2.78E-03         | 1.73E-03         | 1.21E-03         |
| IYOWID   | 5.33E-03 | 9.37E-04        | 1.37E-05        | 7.30E-06         | 4.34E-04       | 3.01E-04       | 1.37E-04        | 7.07E-06                      | 4.12E-03         | 7.90E-04         | 6.43E-04         | 1.49E-03         |

\* No hops were observed on the MD time scale.

Self-diffusion coefficients highlighted grey were overestimated in the MSD method.

**Table S5** Average window diameter of the flexible empty and loaded windows, with all distances in Å. The PLD refers to the result from the static FF-minimized MOF with no adsorbates.

| MOF      | PLD   | Empty | He    | CH <sub>4</sub> | SF <sub>6</sub> | CCl <sub>4</sub> | O <sub>2</sub> | N <sub>2</sub> | CO <sub>2</sub> | C <sub>6</sub> H <sub>6</sub> | H <sub>2</sub> O | n-C <sub>4</sub> | i-C <sub>4</sub> | n-C <sub>6</sub> | mean  | std   | max-min |
|----------|-------|-------|-------|-----------------|-----------------|------------------|----------------|----------------|-----------------|-------------------------------|------------------|------------------|------------------|------------------|-------|-------|---------|
| LOGBAK   | 3.076 | 2.539 | 2.554 | 2.601           | 3.541           | 3.889            | 2.625          | 2.658          | 2.598           | 3.099                         | 2.733            | 3.002            | 3.352            | 2.854            | 2.959 | 0.415 | 1.335   |
| EZOFOF   | 2.938 | 2.660 | 2.771 | 2.974           | 3.831           | 4.462            | 2.812          | 2.972          | 2.871           | 3.251                         | 2.924            | 3.252            | 3.633            | 3.394            | 3.262 | 0.483 | 1.691   |
| HIFVUO01 | 3.198 | 2.923 | 3.084 | 3.840           | 4.862           | 5.065            | 3.485          | 3.664          | 3.378           | 4.137                         | 4.287            | 3.909            | 4.633            | 3.912            | 4.021 | 0.579 | 1.980   |
| HOLQIK   | 3.247 | 2.778 | 4.706 | 5.010           | 5.500           | 6.687            | 4.806          | 4.811          | 4.736           | 4.343                         | 4.209            | 4.870            | 5.434            | 4.718            | 4.986 | 0.624 | 2.478   |
| KUCDIW   | 3.813 | 3.678 | 3.683 | 3.935           | 4.606           | 5.047            | 3.813          | 3.839          | 3.757           | 4.122                         | 3.803            | 3.916            | 4.380            | 3.922            | 4.069 | 0.392 | 1.364   |
| MAPCIP   | 4.501 | 4.419 | 4.417 | 4.421           | 4.557           | 4.804            | 4.417          | 4.415          | 4.414           | 4.421                         | 4.406            | 4.424            | 4.446            | 4.425            | 4.464 | 0.110 | 0.398   |
| BUKRUW01 | 5.018 | 4.065 | 4.137 | 4.153           | 4.703           | 5.192            | 4.075          | 4.124          | 4.078           | 4.099                         | 4.092            | 4.680            | 4.630            | 4.621            | 4.382 | 0.353 | 1.117   |
| ABAYIO   | 5.006 | 4.435 | 4.462 | 4.446           | 4.879           | 5.319            | 4.461          | 4.500          | 4.462           | 4.667                         | 4.466            | 4.562            | 4.845            | 4.542            | 4.634 | 0.252 | 0.873   |
| LUXFOA   | 5.045 | 4.649 | 4.653 | 4.659           | 4.731           | 4.911            | 4.656          | 4.659          | 4.657           | 4.670                         | 4.716            | 4.661            | 4.709            | 4.665            | 4.696 | 0.070 | 0.257   |
| HUJGEA   | 5.143 | 4.649 | 4.772 | 4.719           | 4.802           | 5.390            | 4.724          | 4.749          | 4.623           | 4.767                         | 4.705            | 4.784            | 5.053            | 4.890            | 4.832 | 0.197 | 0.767   |
| VIXPUP01 | 6.604 | 6.375 | 6.356 | 6.380           | 6.392           | 6.515            | 6.362          | 6.373          | 6.357           | 6.342                         | 6.004            | 6.320            | 6.738            | 6.620            | 6.397 | 0.171 | 0.735   |
| GEGDED   | 6.402 | 5.673 | 5.701 | 5.703           | 5.832           | 5.932            | 5.858          | 5.692          | 5.717           | 5.730                         | 5.673            | 5.684            | 5.870            | 5.694            | 5.757 | 0.086 | 0.259   |
| WULJUI   | 6.833 | 6.375 | 6.386 | 6.385           | 6.409           | 6.460            | 6.376          | 6.394          | 6.392           | 6.398                         | 6.381            | 6.403            | 6.408            | 6.394            | 6.399 | 0.021 | 0.084   |
| LAQNID   | 6.808 | 6.357 | 6.360 | 6.549           | 6.365           | 6.582            | 6.372          | 6.377          | 6.374           | 6.350                         | 6.572            | 6.350            | 6.613            | 6.379            | 6.437 | 0.102 | 0.263   |
| KOZQEX   | 6.905 | 6.243 | 6.280 | 6.294           | 6.302           | 6.395            | 6.271          | 6.279          | 6.275           | 6.250                         | 6.277            | 6.279            | 6.293            | 6.290            | 6.290 | 0.034 | 0.145   |
| XICZAM   | 7.563 | 6.712 | 6.645 | 6.708           | 6.863           | 6.926            | 6.699          | 6.719          | 6.769           | 6.793                         | 6.791            | 6.737            | 6.781            | 6.704            | 6.761 | 0.074 | 0.281   |
| IYOWID   | 7.725 | 7.175 | 7.230 | 7.041           | 7.179           | 7.358            | 7.111          | 7.135          | 7.228           | 7.138                         | 7.060            | 7.127            | 7.260            | 7.167            | 7.169 | 0.085 | 0.318   |

**Table S6** Standard deviation of the flexible empty and loaded window size distribution, with all distances in Å.

| MOF      | Empty | He    | CH <sub>4</sub> | SF <sub>6</sub> | CCl <sub>4</sub> | O <sub>2</sub> | N <sub>2</sub> | CO <sub>2</sub> | C <sub>6</sub> H <sub>6</sub> | H <sub>2</sub> O | n-C <sub>4</sub> | i-C <sub>4</sub> | n-C <sub>6</sub> | mean  |
|----------|-------|-------|-----------------|-----------------|------------------|----------------|----------------|-----------------|-------------------------------|------------------|------------------|------------------|------------------|-------|
| LOGBAK   | 0.102 | 0.093 | 0.101           | 0.064           | 0.060            | 0.093          | 0.087          | 0.093           | 0.088                         | 0.181            | 0.092            | 0.091            | 0.090            | 0.095 |
| EZOFOF   | 0.200 | 0.203 | 0.161           | 0.145           | 0.151            | 0.178          | 0.188          | 0.158           | 0.158                         | 0.200            | 0.151            | 0.166            | 0.183            | 0.172 |
| HIFVUO01 | 0.260 | 0.311 | 0.269           | 0.187           | 0.129            | 0.326          | 0.301          | 0.327           | 0.254                         | 0.302            | 0.266            | 0.229            | 0.276            | 0.264 |
| HOLQIK   | 0.313 | 0.408 | 0.568           | 0.334           | 0.365            | 0.429          | 0.414          | 0.370           | 0.283                         | 0.388            | 0.443            | 0.363            | 0.437            | 0.393 |
| KUCDIW   | 0.277 | 0.265 | 0.214           | 0.153           | 0.114            | 0.240          | 0.233          | 0.257           | 0.237                         | 0.254            | 0.231            | 0.213            | 0.223            | 0.224 |
| MAPCIP   | 0.131 | 0.130 | 0.126           | 0.125           | 0.101            | 0.125          | 0.138          | 0.131           | 0.136                         | 0.130            | 0.125            | 0.117            | 0.124            | 0.126 |
| BUKRUW01 | 0.242 | 0.276 | 0.241           | 0.168           | 0.158            | 0.247          | 0.242          | 0.251           | 0.207                         | 0.266            | 0.230            | 0.219            | 0.217            | 0.228 |
| ABAYIO   | 0.226 | 0.224 | 0.222           | 0.181           | 0.164            | 0.232          | 0.222          | 0.227           | 0.214                         | 0.224            | 0.217            | 0.230            | 0.217            | 0.215 |
| LUXFOA   | 0.105 | 0.114 | 0.103           | 0.103           | 0.094            | 0.106          | 0.107          | 0.104           | 0.109                         | 0.115            | 0.108            | 0.113            | 0.107            | 0.107 |
| HUJGEA   | 0.315 | 0.314 | 0.295           | 0.233           | 0.164            | 0.362          | 0.302          | 0.376           | 0.287                         | 0.319            | 0.294            | 0.254            | 0.278            | 0.292 |
| VIXPUP01 | 0.341 | 0.354 | 0.337           | 0.336           | 0.296            | 0.336          | 0.320          | 0.331           | 0.321                         | 0.344            | 0.440            | 0.340            | 0.348            | 0.342 |
| GEGDED   | 0.194 | 0.216 | 0.204           | 0.227           | 0.213            | 0.259          | 0.206          | 0.211           | 0.214                         | 0.206            | 0.192            | 0.208            | 0.205            | 0.212 |
| WULJUJ   | 0.245 | 0.239 | 0.248           | 0.245           | 0.228            | 0.251          | 0.252          | 0.245           | 0.237                         | 0.236            | 0.252            | 0.234            | 0.245            | 0.243 |
| LAQNID   | 0.213 | 0.201 | 0.261           | 0.198           | 0.220            | 0.197          | 0.207          | 0.187           | 0.197                         | 0.229            | 0.183            | 0.247            | 0.196            | 0.210 |
| KOZQEX   | 0.238 | 0.250 | 0.239           | 0.237           | 0.225            | 0.249          | 0.247          | 0.254           | 0.254                         | 0.234            | 0.238            | 0.243            | 0.248            | 0.243 |
| XICZAM   | 0.356 | 0.452 | 0.429           | 0.362           | 0.347            | 0.321          | 0.362          | 0.381           | 0.414                         | 0.393            | 0.440            | 0.415            | 0.439            | 0.393 |
| IYOWID   | 0.338 | 0.375 | 0.329           | 0.330           | 0.377            | 0.313          | 0.332          | 0.375           | 0.324                         | 0.346            | 0.325            | 0.364            | 0.290            | 0.340 |



**Table S7** Comparison of Self-diffusion coefficients [ $\text{cm}^2/\text{s}$ ] of the alkanes in rigid and flexible MOF-5 using UFF4MOF. Results shown as “Rigid adsorbate test” are for flexible adsorbates simulated without their internal degrees of freedom in a rigid framework.

|                             | <b>n-C<sub>4</sub></b> | <b>n-C<sub>6</sub></b> | <b>i-C<sub>4</sub></b> |
|-----------------------------|------------------------|------------------------|------------------------|
| <b>Flexible Framework</b>   | 1.02E-04               | 4.03E-05               | 9.76E-05               |
| <b>Rigid Framework</b>      | 1.33E-03               | 7.73E-04               | 1.09E-03               |
| <b>Rigid Adsorbate Test</b> | 1.19E-04               | 3.04E-05               | 8.38E-05               |

**Table S8** Fitted adsorbate equivalent diameter and uncertainty.

| <b>Ads</b>                        | <b>d<sub>eq</sub></b><br><b>[Å]</b> | <b>ε</b><br><b>[order of mag.]</b> |
|-----------------------------------|-------------------------------------|------------------------------------|
| <b>He</b>                         | 3.44                                | 0.62                               |
| <b>CH<sub>4</sub></b>             | 3.80                                | 1.47                               |
| <b>SF<sub>6</sub></b>             | 5.10                                | 1.13                               |
| <b>CCl<sub>4</sub></b>            | 7.00                                | 2.90                               |
| <b>O<sub>2</sub></b>              | 3.58                                | 0.35                               |
| <b>N<sub>2</sub></b>              | 3.63                                | 0.37                               |
| <b>CO<sub>2</sub></b>             | 3.72                                | 0.51                               |
| <b>C<sub>6</sub>H<sub>6</sub></b> | 4.04                                | 1.58                               |
| <b>H<sub>2</sub>O</b>             | 3.84                                | 1.44                               |
| <b>n-C<sub>4</sub></b>            | 4.09                                | 1.15                               |
| <b>i-C<sub>4</sub></b>            | 5.21                                | 5.18                               |
| <b>n-C<sub>6</sub></b>            | 4.24                                | 1.19                               |

\* Uncertainty  $\epsilon$  was calculated by:

$$\epsilon = \sqrt{\frac{\sum_i^N (\log D_s^{sim} - \log D_s^{pre})^2}{N}}$$

where N is the number of MOFs,  $D_s^{sim}$  is the simulated self-diffusion coefficient,  $D_s^{pre}$  is the predicted self-diffusion coefficient by assuming linear correlation between the self-diffusion

coefficient and adsorbate equivalent diameter. Benchmark points for the line locating are CH<sub>4</sub> and SF<sub>6</sub>. The unit of  $\epsilon$  is order of magnitude in diffusion coefficient.

**Table S9** Fitted slopes, m, intercepts, b, and R-squared values in Figure 11.

| <b>MOF</b>      | <b>m</b> | <b>b</b> | <b>R<sup>2</sup></b> |
|-----------------|----------|----------|----------------------|
| <b>LOGBAK</b>   | 0.402    | 1.228    | 0.891                |
| <b>EZOFOF</b>   | 0.483    | 1.183    | 0.950                |
| <b>HIFVUO01</b> | 0.511    | 1.820    | 0.741                |
| <b>HOLQIK</b>   | 0.579    | 2.491    | 0.820                |
| <b>KUCDIW</b>   | 0.388    | 2.397    | 0.932                |
| <b>MAPCIP</b>   | 0.104    | 4.017    | 0.853                |
| <b>BUKRUW01</b> | 0.324    | 2.985    | 0.802                |
| <b>ABAYIO</b>   | 0.253    | 3.544    | 0.962                |
| <b>LUXFOA</b>   | 0.067    | 4.409    | 0.865                |
| <b>HUJGEA</b>   | 0.187    | 4.027    | 0.855                |
| <b>VIXPUP01</b> | 0.082    | 6.045    | 0.218                |
| <b>GEGDED</b>   | 0.068    | 5.466    | 0.590                |
| <b>WULJUJ</b>   | 0.020    | 6.312    | 0.897                |
| <b>LAQNID</b>   | 0.054    | 6.206    | 0.263                |
| <b>KOZQEX</b>   | 0.031    | 6.157    | 0.783                |
| <b>XICZAM</b>   | 0.064    | 6.487    | 0.704                |
| <b>IYOWID</b>   | 0.062    | 6.900    | 0.510                |

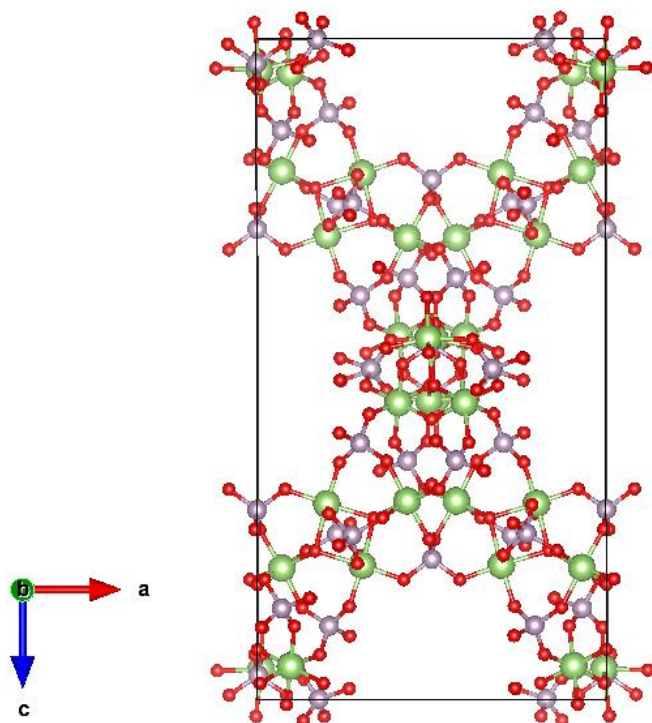

**Figure S1.** Illustration of MAPCIP.

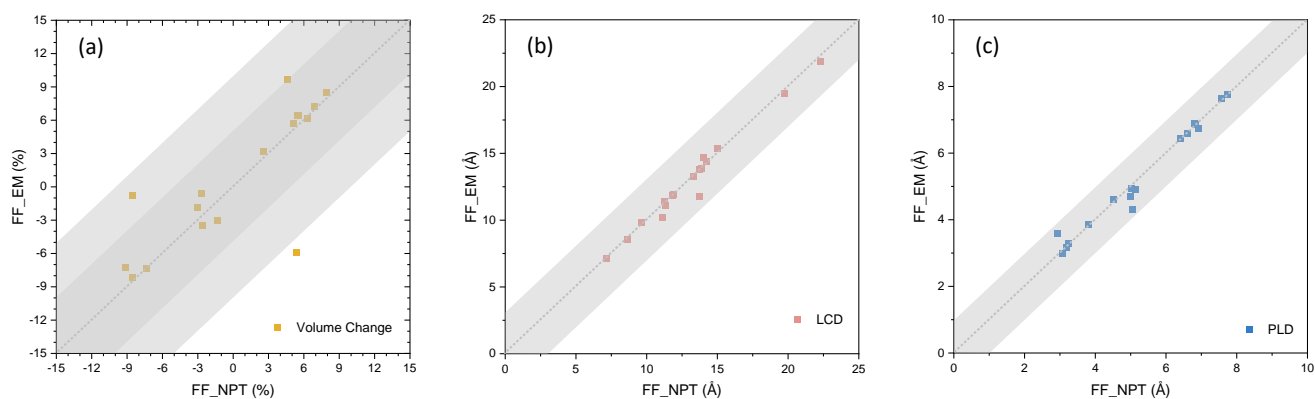

**Figure S2.** Comparison of (a) unit cell volume change compared to the experimental structures, (b) LCD and (c) PLD between energy minimized (EM) and NPT relaxed structures using UFF4MOF. The dark shading (light shading) in plot (a) indicates where the deviation between EM and NPT results are less than 5% (10%). The shading in (b) and (c) indicate where the deviation between EM and NPT results are less than 3 Å and 1 Å, respectively.

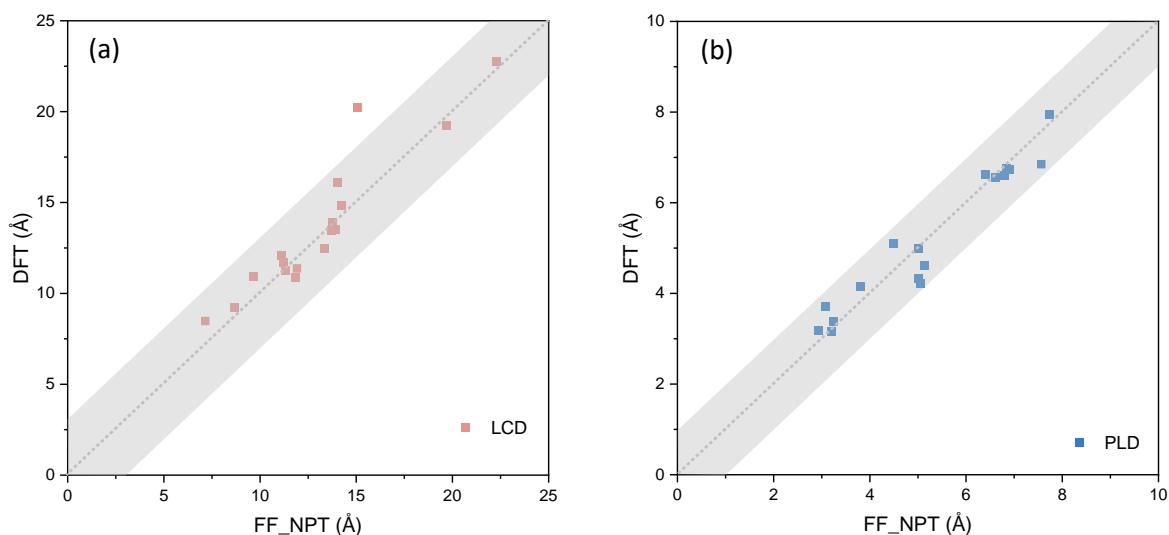

**Figure S3.** Comparison of (a) LCD and (b) PLD between FF optimized and DFT optimized structures. The shadings in plot (a) and plot (b) indicate where the deviation between FF and DFT results are less than 3 Å and 1 Å, respectively.

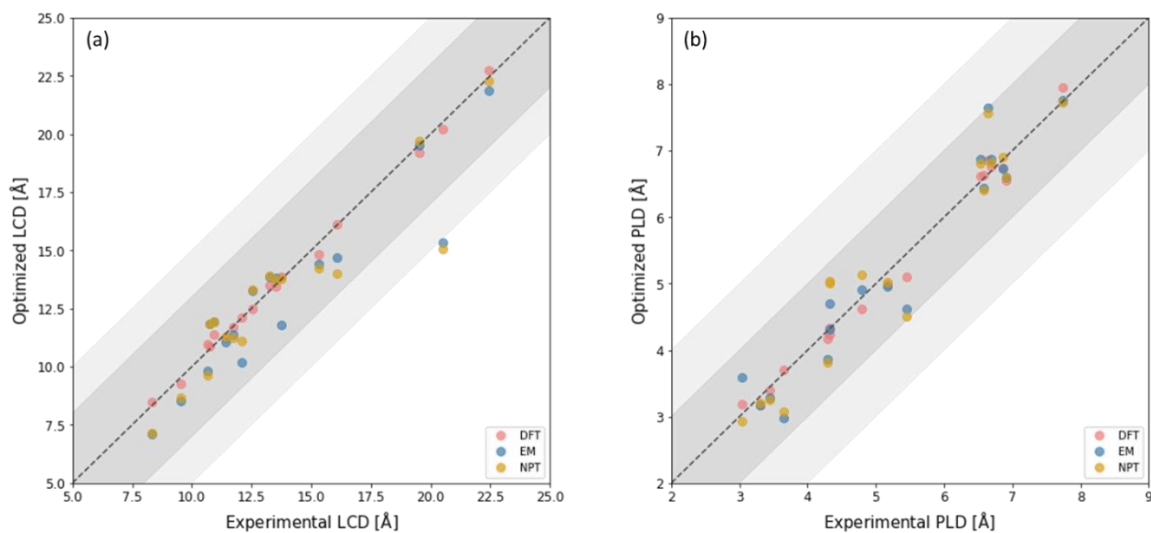

**Figure S4.** Comparison of (a) LCD and (b) PLD between experimental structures and DFT (red) optimized, FF energy minimized (blue) and NPT relaxed (yellow) structures. The dark shading (light shading) in (a) indicates where the deviation between optimized and experimental LCD are less than 3 Å (5 Å). The dark shading (light shading) in (b) indicates where the deviation between optimized and experimental PLD are less than 1 Å (2 Å).

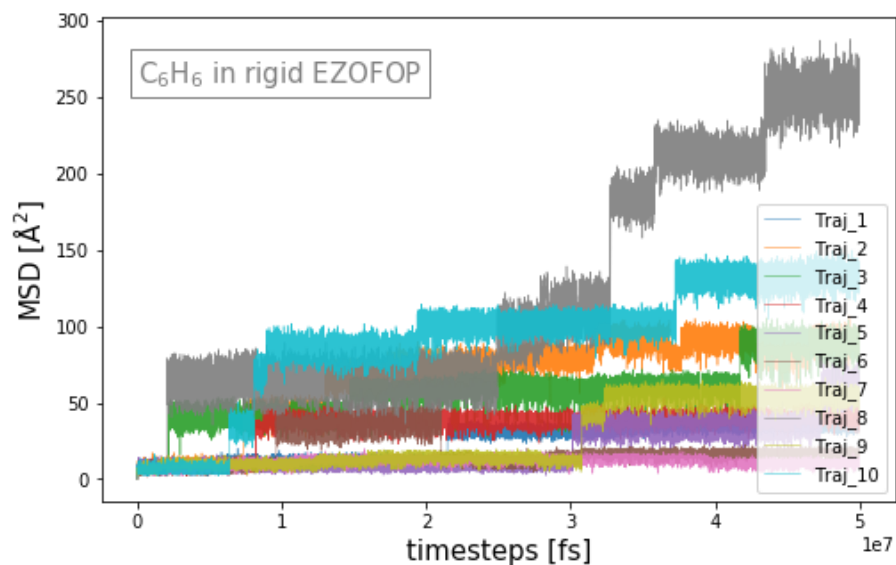

**Figure S5.** MSD profiles showing discrete hops of  $C_6H_6$  in rigid EZOFOP at 308K.

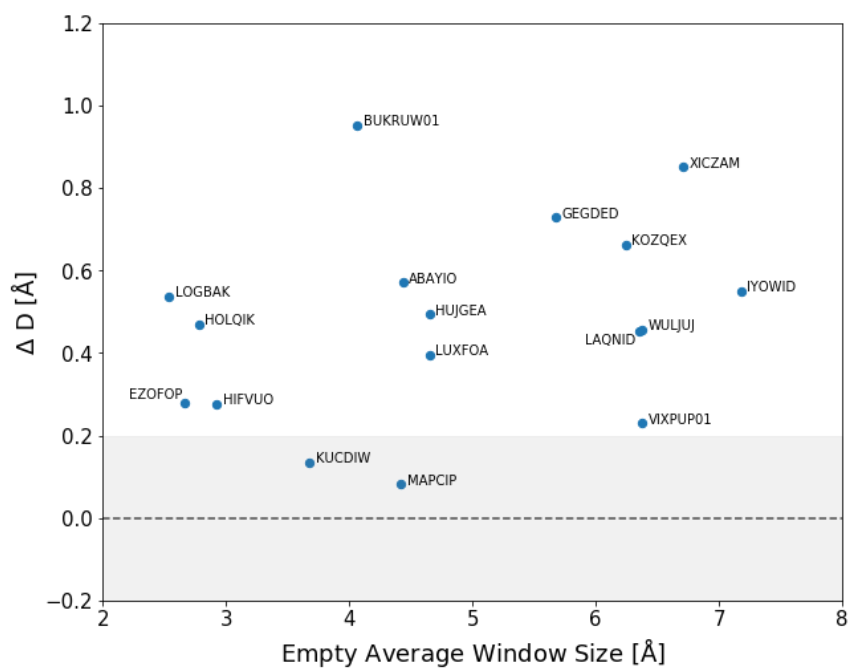

**Figure S6.** Differences between the rigid and average flexible window diameters plotted as a function of empty average window size for 17 MOFs. The shading indicates where the differences are within  $\pm 0.2 \text{ \AA}$ .

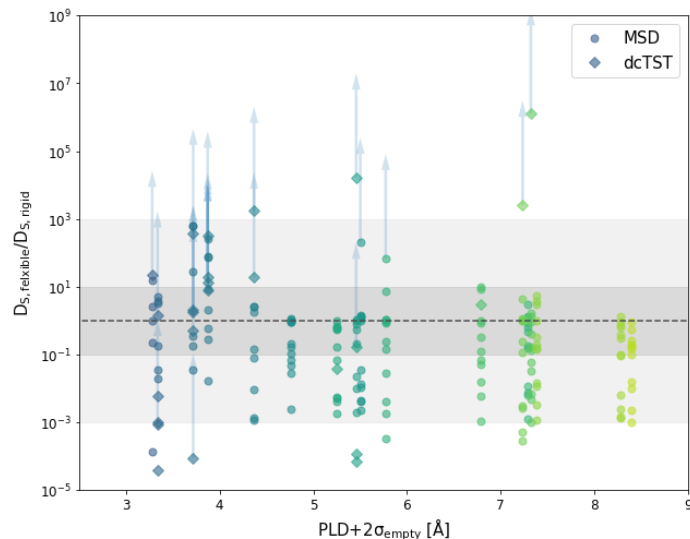

**Figure S7.** Ratio of self-diffusivities in flexible frameworks to diffusivities in rigid frameworks plotted as a function of corrected window size (PLD +  $2\sigma$  of the empty window size distribution). In flexible frameworks, calculations performed with MD (dcTST) are denoted with circles (diamonds). . The dark shading (light shading) indicates where the deviation of the ratios are less than one order of magnitude (three orders of magnitude).

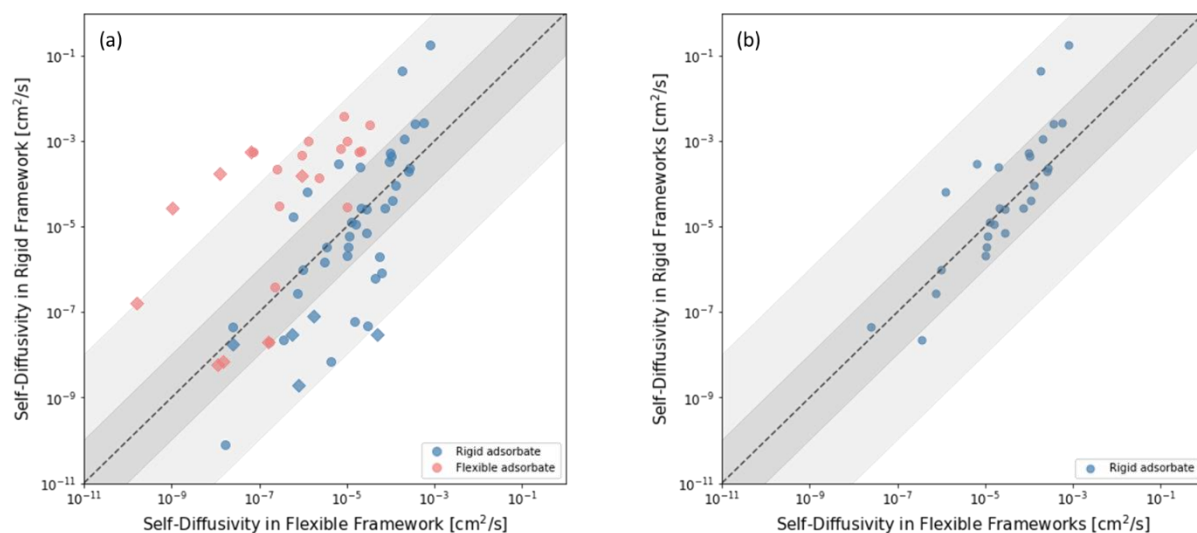

**Figure S8.** Comparison of self-diffusivities between simulations with rigid and flexible small pore MOFs. (a) all adsorbates; (b) rigid adsorbates who expand the corresponding window size smaller than  $0.4 \text{\AA}$ . In flexible frameworks, calculations performed with MD (dcTST) are denoted with circles (diamonds). . The dark shading (light shading) indicates where the

deviation between the rigid and flexible results are less than one order of magnitude (three orders of magnitude).
